# Supplementary material for: Divergent LysM effectors contribute to the virulence of Beauveria bassiana by evasion of insect immune defenses
Source: PLoS Pathog. 2017 Sep 5;13(9):e1006604. doi: 10.1371/journal.ppat.1006604 (PMC5600412; doi:10.1371/journal.ppat.1006604)
Supplement: S2 Table — (XLSX) [file ppat.1006604.s002.xlsx]

## Sheet: Sheet1
S2 Table. LysM domain-containing proteins identified in the selected plant and mammalian pathogenic fungi.
Gene ID	Fungal species	Length (aa)
BC1T_03481	Botrytis cinerea	401
BC1T_13975	Botrytis cinerea	227
FGSG_00029	Fusarium graminearum	178
FGSG_02234	Fusarium graminearum	177
FGSG_02255	Fusarium graminearum	221
FGSG_03554	Fusarium graminearum	403
FGSG_07569	Fusarium graminearum	883
FGSG_09119	Fusarium graminearum	515
FGSG_10561	Fusarium graminearum	1480
FGSG_10563	Fusarium graminearum	366
FGSG_12208	Fusarium graminearum	242
FGSG_12918	Fusarium graminearum	518
FGSG_13855	Fusarium graminearum	314
Coche_107495	Cochliobolus heterostrophus	289
Coche_19747	Cochliobolus heterostrophus	424
Coche_21056	Cochliobolus heterostrophus	475
Coche_23134	Cochliobolus heterostrophus	190
Coche_24328	Cochliobolus heterostrophus	880
Coche_25489	Cochliobolus heterostrophus	382
Coche_29375	Cochliobolus heterostrophus	386
Coche_30417	Cochliobolus heterostrophus	562
Coche_32914	Cochliobolus heterostrophus	229
Coche_66157	Cochliobolus heterostrophus	267
Coche_68348	Cochliobolus heterostrophus	636
Coche_69155	Cochliobolus heterostrophus	809
Coche_71410	Cochliobolus heterostrophus	508
Coche_72945	Cochliobolus heterostrophus	597
Coche_8916	Cochliobolus heterostrophus	192
Lema_70100	Leptosphaeria maculans	374
Lema_T102640	Leptosphaeria maculans	147
Lema_25400	Leptosphaeria maculans	1327
Mycfi2_124911	Mycosphaerella fijiensis	94
Mycfi2_139546	Mycosphaerella fijiensis	598
Mycfi2_212004	Mycosphaerella fijiensis	413
Mycfi2_30096	Mycosphaerella fijiensis	169
Mycfi2_34332	Mycosphaerella fijiensis	192
Mycfi2_86673	Mycosphaerella fijiensis	189
KNB00203	Fusarium oxysporum	177
KNB01820	Fusarium oxysporum	363
KNB03156	Fusarium oxysporum	288
KNB03187	Fusarium oxysporum	265
KNB07606	Fusarium oxysporum	1540
KNB07608	Fusarium oxysporum	371
KNB12197	Fusarium oxysporum	406
KNB14323	Fusarium oxysporum	218
KNB16476	Fusarium oxysporum	527
KNB17285	Fusarium oxysporum	883
KNB17681	Fusarium oxysporum	525
KNB17682	Fusarium oxysporum	436
KNB19741	Fusarium oxysporum	602
KNB19742	Fusarium oxysporum	422
KNB20034	Fusarium oxysporum	143
KNB20759	Fusarium oxysporum	1568
KNB20761	Fusarium oxysporum	510
KNB20821	Fusarium oxysporum	407
MGG_03307	Magnaporthe oryzae	340
MGG_03468	Magnaporthe oryzae	285
MGG_04532	Magnaporthe oryzae	494
MGG_05628	Magnaporthe oryzae	352
MGG_07571	Magnaporthe oryzae	142
MGG_09419	Magnaporthe oryzae	437
MGG_09548	Magnaporthe oryzae	223
MGG_10097	Magnaporthe oryzae	162
PTRT_00260	Pyrenophora tritici-repentis	188
PTRT_04680	Pyrenophora tritici-repentis	569
PTRT_05421	Pyrenophora tritici-repentis	175
PTRT_10217	Pyrenophora tritici-repentis	391
SNOT_00115	Phaeosphaeria nodorum	366
SNOT_08478	Phaeosphaeria nodorum	432
SNOT_08479	Phaeosphaeria nodorum	341
SNOT_14526	Phaeosphaeria nodorum	668
SNOT_14804	Phaeosphaeria nodorum	177
SS1T_00772	Sclerotinia sclerotiorum	575
SS1T_03535	Sclerotinia sclerotiorum	228
SS1T_05453	Sclerotinia sclerotiorum	566
SS1T_12509	Sclerotinia sclerotiorum	447
SS1T_12513	Sclerotinia sclerotiorum	363
VDAG_00901	Verticillium albo-atrum	1330
VDAG_00902	Verticillium albo-atrum	375
VDAG_01171	Verticillium albo-atrum	174
VDAG_04781	Verticillium albo-atrum	690
VDAG_05180	Verticillium albo-atrum	145
VDAG_06998	Verticillium albo-atrum	513
VDAG_07000	Verticillium albo-atrum	1305
VDAG_08171	Verticillium albo-atrum	516
VDBG_03672	Verticillium albo-atrum	375
VDBG_03944	Verticillium albo-atrum	172
VDBG_05348	Verticillium albo-atrum	393
VDBG_05350	Verticillium albo-atrum	1305
VDBG_08506	Verticillium albo-atrum	518
VDBG_09550	Verticillium albo-atrum	694
VDBG_09766	Verticillium albo-atrum	451
MYCGRDRAFT_111221	Zymoseptoria tritici	232
MYCGRDRAFT_110386	Zymoseptoria tritici	194
MYCGRDRAFT_46450	Zymoseptoria tritici	244
MYCGRDRAFT_45634	Zymoseptoria tritici	544
AFUA_1G15420	Aspergillus fumigatus	434
AFUA_5G03960	Aspergillus fumigatus	435
AFUA_5G03980	Aspergillus fumigatus	378
AFUA_5G06840	Aspergillus fumigatus	458
AFUA_6G00720	Aspergillus fumigatus	439
AFUA_6G09320	Aspergillus fumigatus	449
AFUA_6G09790	Aspergillus fumigatus	672
AFUA_6G13720	Aspergillus fumigatus	729
CIMG_04760	Coccidioides immitis	712
CIMG_05250	Coccidioides immitis	360
CPAT_06616	Coccidioides posadasii	308
CPAT_07086	Coccidioides posadasii	297
ARB_00648	Arthroderma benhamiae	505
ARB_01488	Arthroderma benhamiae	455
ARB_02188	Arthroderma benhamiae	283
ARB_02398	Arthroderma benhamiae	275
ARB_03438	Arthroderma benhamiae	478
ARB_04752	Arthroderma benhamiae	377
ARB_05153	Arthroderma benhamiae	269
ARB_05157	Arthroderma benhamiae	408
HCAG_01250	Histoplasma capsulatum	262
MGYG_00520	Microsporum gypseum	424
MGYG_00525	Microsporum gypseum	394
MGYG_01575	Microsporum gypseum	523
MGYG_02371	Microsporum gypseum	450
MGYG_02458	Microsporum gypseum	1284
MGYG_02461	Microsporum gypseum	1258
MGYG_02558	Microsporum gypseum	1287
MGYG_03596	Microsporum gypseum	1224
MGYG_04178	Microsporum gypseum	1467
MGYG_04626	Microsporum gypseum	1501
MGYG_04974	Microsporum gypseum	1123
MGYG_05313	Microsporum gypseum	1033
MGYG_06331	Microsporum gypseum	502
MGYG_06333	Microsporum gypseum	502
MGYG_06915	Microsporum gypseum	128
MGYG_06918	Microsporum gypseum	664
MGYG_07232	Microsporum gypseum	470
MGYG_08116	Microsporum gypseum	496
MGYG_08119	Microsporum gypseum	313
MGYG_08723	Microsporum gypseum	489
MGYG_08863	Microsporum gypseum	440
TERG_01015	Trichophyton rubrum	1378
TERG_01019	Trichophyton rubrum	132
TERG_01873	Trichophyton rubrum	552
TERG_02813	Trichophyton rubrum	1472
TERG_03618	Trichophyton rubrum	465
TERG_03756	Trichophyton rubrum	192
TERG_05625	Trichophyton rubrum	511
TERG_05627	Trichophyton rubrum	292
TERG_05627	Trichophyton rubrum	523
TERG_08672	Trichophyton rubrum	220
TERG_11957	Trichophyton rubrum	1153
